# Supplementary material for: Three-in-one is really better: exploring the sensing and adsorption properties in a newly designed metal–organic system incorporating a copper(ii) ion
Source: Royal Society of Chemistry journal article supplement (doi:10.1039/c9dt02578b), 2019-01-01
Supplement: c9dt02578b1.pdf [file c9dt02578b1.pdf]

### **Electronic Supplementary Information**

**Three-in-one is really better: Exploring sensing and adsorption properties in a newly designed metal-organic system incorporating copper(II) ion**

**Formula for calculating the percentage of Nitrobenzene fluorescence intensity quenching:**

$$(I_0 - I) / I_0 \times 100\%$$

Where,  $I_0$  = initial fluorescence intensity,  
 $I$  = intensity of CP (**1**) containing nitrobenzene solution.

**Reference:** (a) S. Pramanik, C. Zheng, X. Zhang, T. J. Emge and J. Li, *J. Am. Chem. Soc.*, 2011, **133**, 4153; (b) D. Banerjee, Z. Hu and J. Li, *Dalton Trans.*, 2014, **43**, 10668.

**Stern-Volmer equation:**

$$I_0/I = K_{SV}[A] + 1$$

Where,  $I_0$  = fluorescent intensity of CP (**1**) before the addition of the analyte  
 $I$  = fluorescent intensity after the addition of the respective analyte  
 $K_{SV}$  = Stern-Volmer constant  
 $[A]$  = molar concentration of the analyte ( $M^{-1}$ ).

**Topological analysis for CP (**1**)**

1:C7 Cu N2 O S

Topology for Cu1

-----

Atom Cu1 links by bridge ligands and has

| Common vertex with                           | R(A-A) |
|----------------------------------------------|--------|
| Cu 1 -0.0054 0.6154 -0.0523 ( 0 1 0 ) 3.004A | 1      |
| Cu 1 0.0054 0.1154 -0.4477 ( 0 0 -1 ) 5.416A | 1      |
| Cu 1 0.0054 0.1154 0.5523 ( 0 0 0 ) 5.416A   | 1      |

-----

Structural group analysis

-----

-----

Structural group No 1

-----

Structure consists of layers ( 1 0 0) with Cu

Coordination sequences

-----

Cu1: 1 2 3 4 5 6 7 8 9 10

Num 3 6 9 12 15 18 21 24 27 30

Cum 4 10 19 31 46 64 85 109 136 166

-----

TD10=166

Vertex symbols for selected sublattice

-----

Cu1 Point symbol:{6<sup>3</sup>}

Extended point symbol:[6.6.6]

-----

**Point symbol for net: {6<sup>3</sup>}**

**3-c net; uninodal net**

**Topological type: hcb; Shubnikov hexagonal plane net/(6,3)**

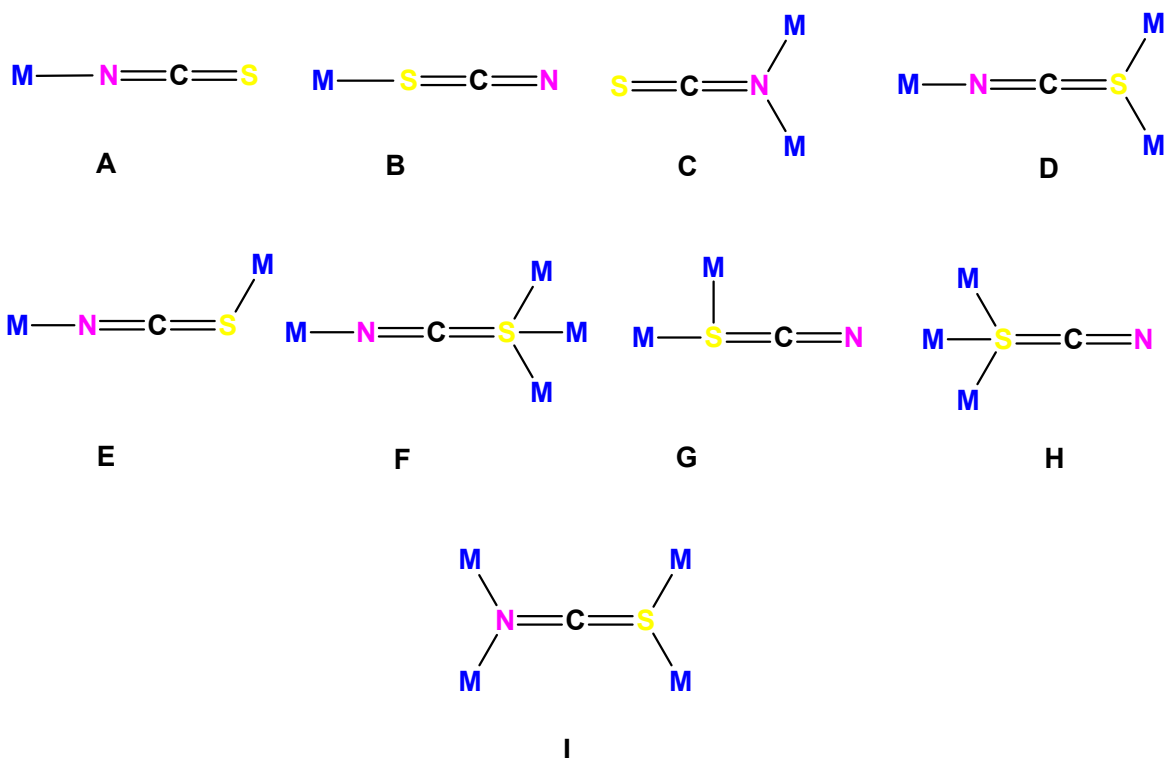

**Scheme S1** Important coordination modes of NaSCN ligand.

**Table S1** Selected bond lengths (Å) and bond angle (degree) for CP (**1**)

|           |            |
|-----------|------------|
| Cu1–Cu1   | 3.0041     |
| Cu1–O1    | 1.917(3)   |
| Cu1–O1    | 1.930(3)   |
| Cu1–N1    | 1.980(4)   |
| Cu1–N2    | 1.915(4)   |
| N1–Cu1–O1 | 158.83(14) |
| N1–Cu1–O1 | 81.85(14)  |
| N2Cu1O1   | 99.46(15)  |
| N2–Cu1–O1 | 169.68(15) |
| N2–Cu1–N1 | 100.41(16) |
| C1–O1–Cu1 | 138.8(3)   |
| C1–O1–Cu1 | 115.3(3)   |
| C2–N1–Cu1 | 113.5(3)   |
| C6–N1–Cu1 | 127.7(3)   |
| C7–N2–Cu1 | 168.7(4)   |

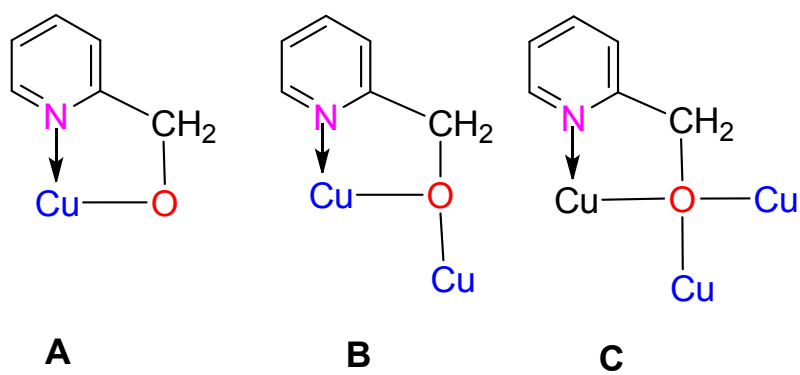

**Scheme S2.** Important coordination modes of hmp ligand.

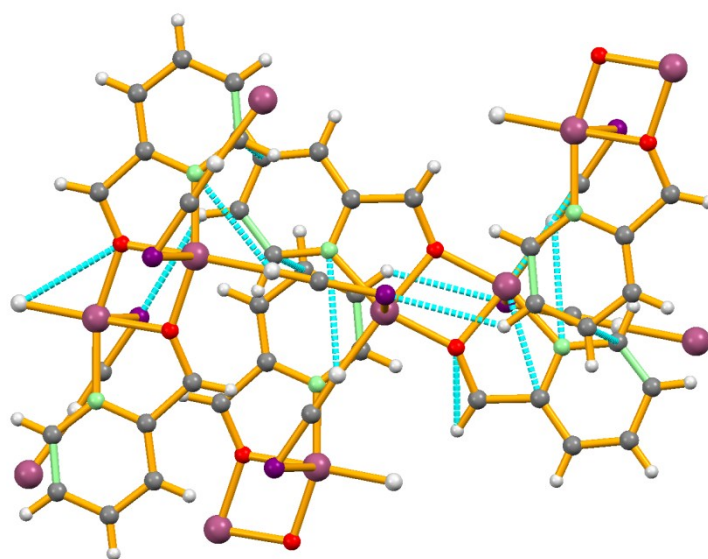

**Figure S1:** Formation of 3-D supramolecular network due to various supramolecular interaction in CP (**1**).

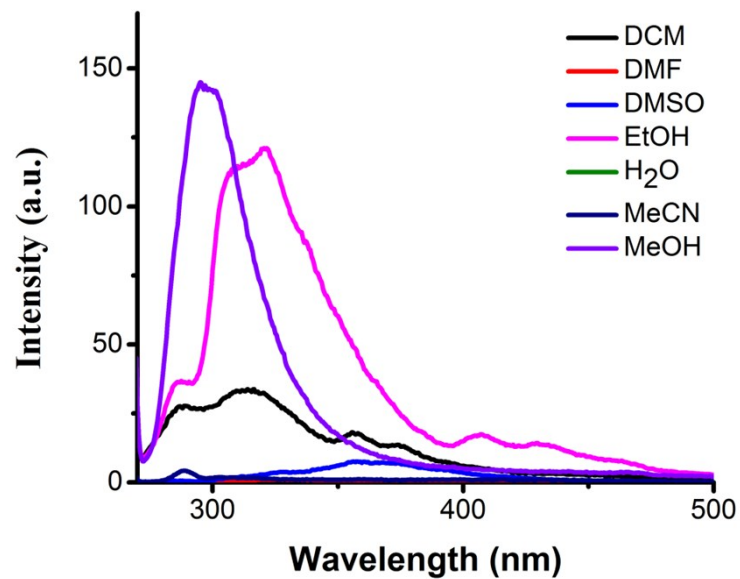

**Figure S2:** Emission spectrum of CP (**1**) dipped in different solvents upon excitation at 250 nm.

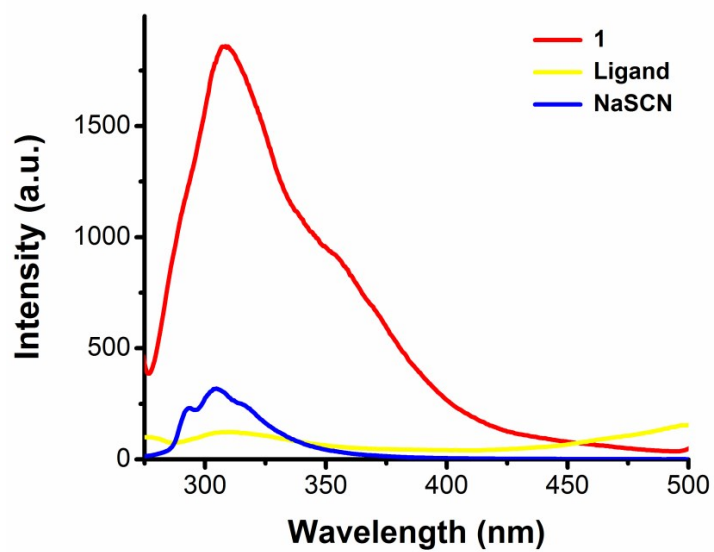

**Figure S3:** Emission spectrum of CP (**1**), hmpH and NaSCN ligand in methanol upon excitation at 250 nm.

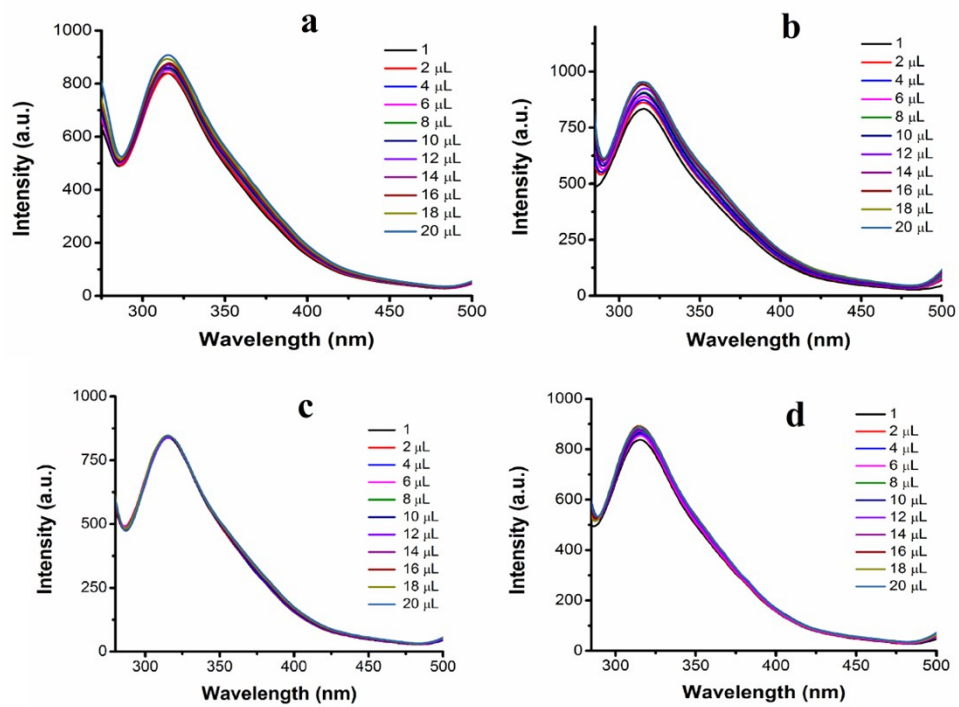

**Figure S4:** The change in fluorescence intensity of CP (**1**) upon incremental addition of DNT (a), m-DNB (b), NT (c) and p-DNB (d) solution.

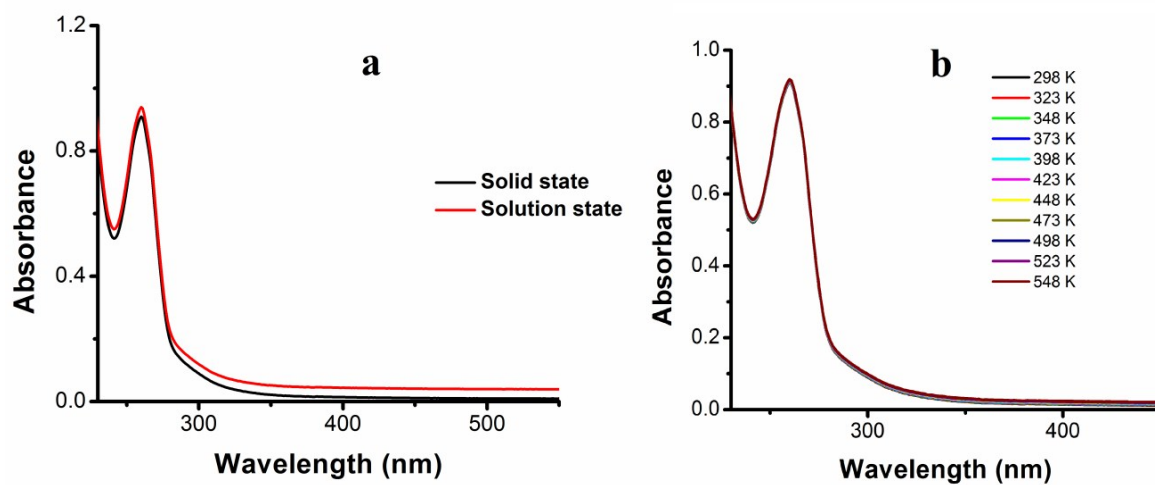

**Figure S5:** Solid and solution state (a), temperature dependent (b) UV-Visible spectra of CP (1) in methanol.

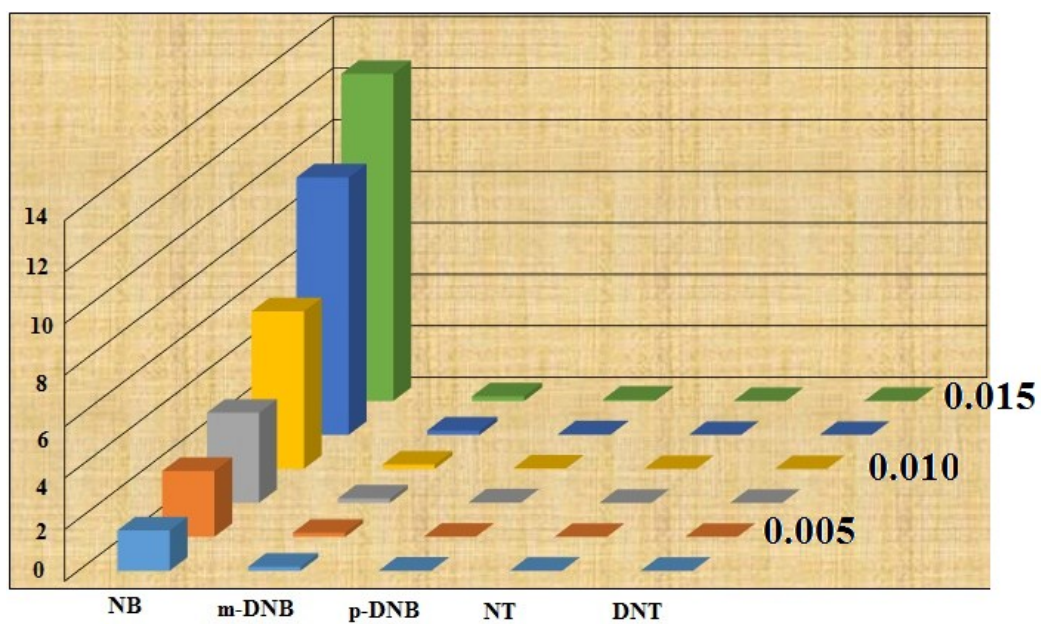

**Figure S6:** 3-D representation of Stern–Volmer (SV) plot for various nitro aromatic analytes.

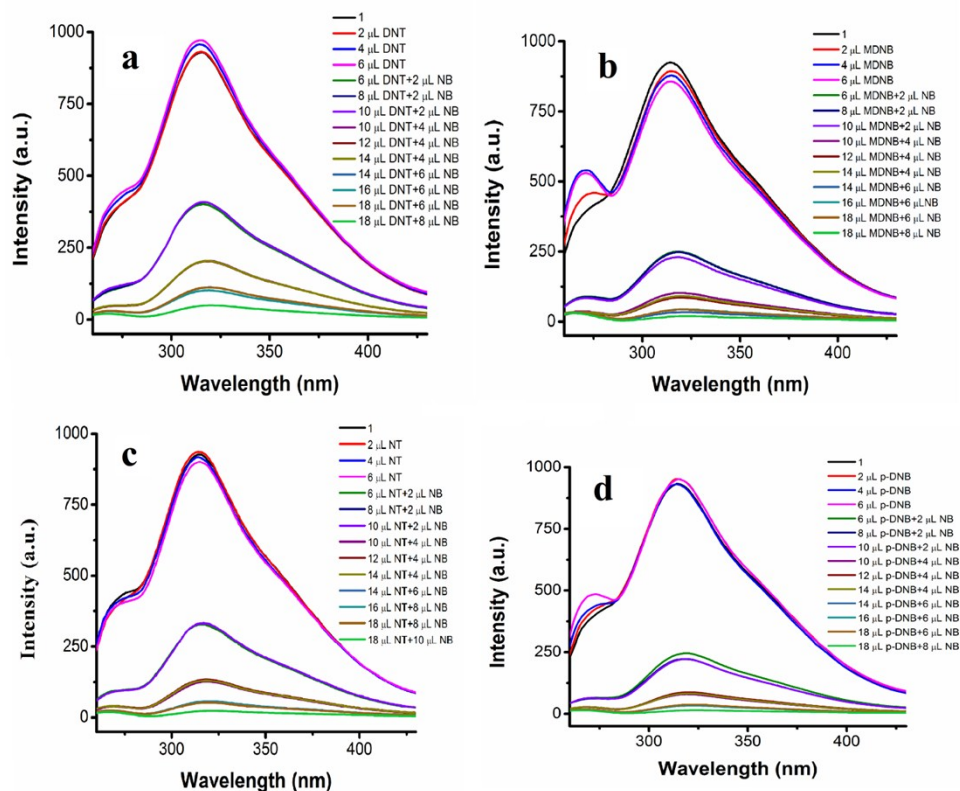

**Figure S7:** The change in fluorescence intensity of CP (**1**) upon addition of DNT (a), m-DNB (b), NT (c) and p-DNB (d) followed by NB.

**Table S2:** - HOMO and LUMO energies calculated for nitroaromatics analytes and hmpH (ligand) at B3LYP/6- 31G\* level of theory.

| Compound | HOMO     | LUMO     | Band Gap |
|----------|----------|----------|----------|
| p-NB     | -8.4592  | -4.3364  | 4.1228   |
| m-NB     | -8.42899 | -3.93558 | 4.4934   |
| d-NT     | -7.99661 | -3.79708 | 4.1995   |
| NT       | -7.60395 | -3.09151 | 4.5124   |
| NB       | -7.63606 | -2.94917 | 4.6868   |
| Ligand   | -6.93727 | -1.55662 | 5.3806   |

**Table S3: The Vapor pressure and reduction potential of common explosives and selected analytes**

| Analytes                                   | Vapor Pressure<br>(in mmHg, <sup>#</sup><br>at 25 °C) | Reduction Potential <sup>(a)</sup><br>(in V vs SCE) |
|--------------------------------------------|-------------------------------------------------------|-----------------------------------------------------|
| Nitrobenzene (NB) <sup>16</sup>            | 0.2416                                                | -1.15                                               |
| 1,3-Dinitrobenzene (m-DNB) <sup>17</sup>   | $8.82 \times 10^{-4}$                                 | -0.9                                                |
| 1,4-Dinitrobenzene (p-DNB) <sup>16</sup>   | $2.406 \times 10^{-5}$                                | -0.7                                                |
| 2-Nitrotoluene (NT) <sup>16</sup>          | 0.1602                                                | -1.2                                                |
| 2,4-Dinitrotoluene (2,4-DNT) <sup>16</sup> | $1.44 \times 10^{-4}$                                 | -1.0                                                |

<sup>#</sup>1 mmHg =  $1.2468 \times 10^3$  ppm

<sup>(a)</sup>Debasis Banerjee, Zhichao Hu, and Jing Li, *DaltonTrans.*, 2014, **43**, 10668.

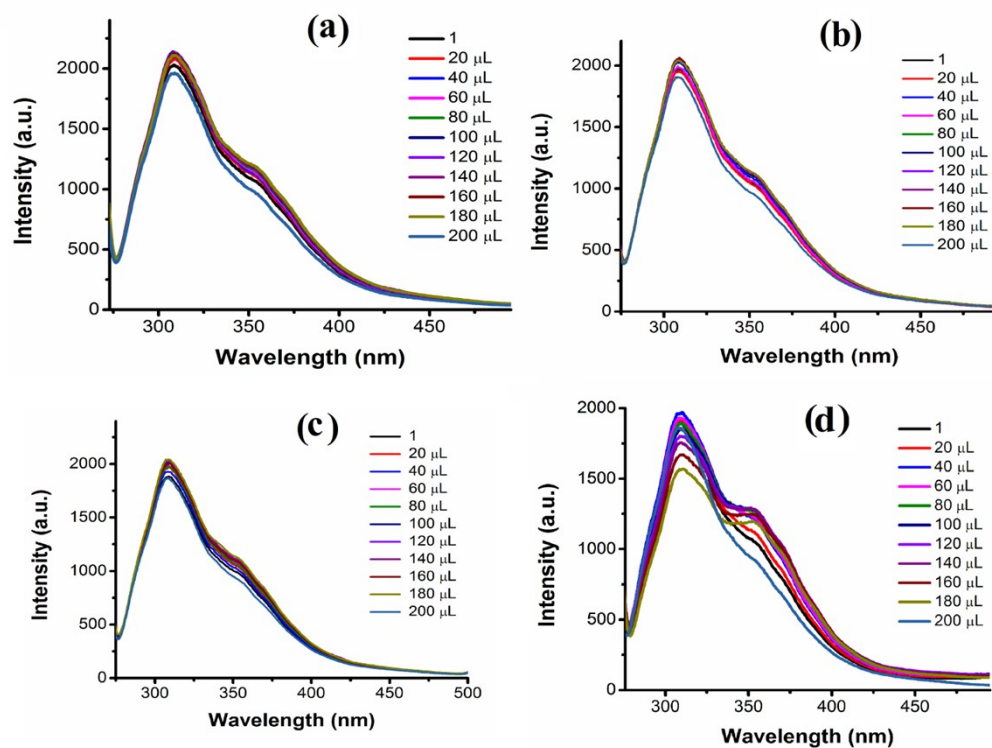

**Figure S8:** Emission spectrum of CP (**1**) upon incremental addition of 1mM solution of  $K^+$  (a),  $Ca^{2+}$  (b),  $Mg^{2+}$  (c) and  $Cr^{3+}$  (d) metal ions in methanol.

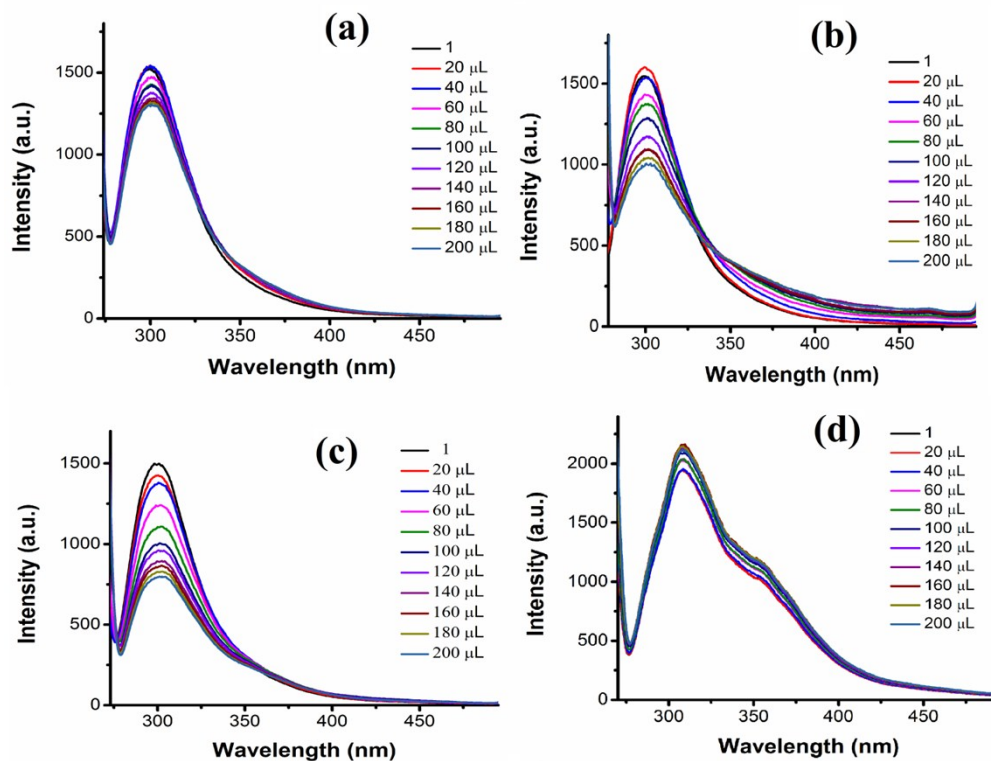

**Figure S9:** Emission spectrum of CP (**1**) upon incremental addition of 1mM solution of  $\text{Mn}^{2+}$ (a),  $\text{Co}^{2+}$ (b),  $\text{Ni}^{2+}$ (c) and  $\text{Cu}^{2+}$ (d) metal ions in methanol.

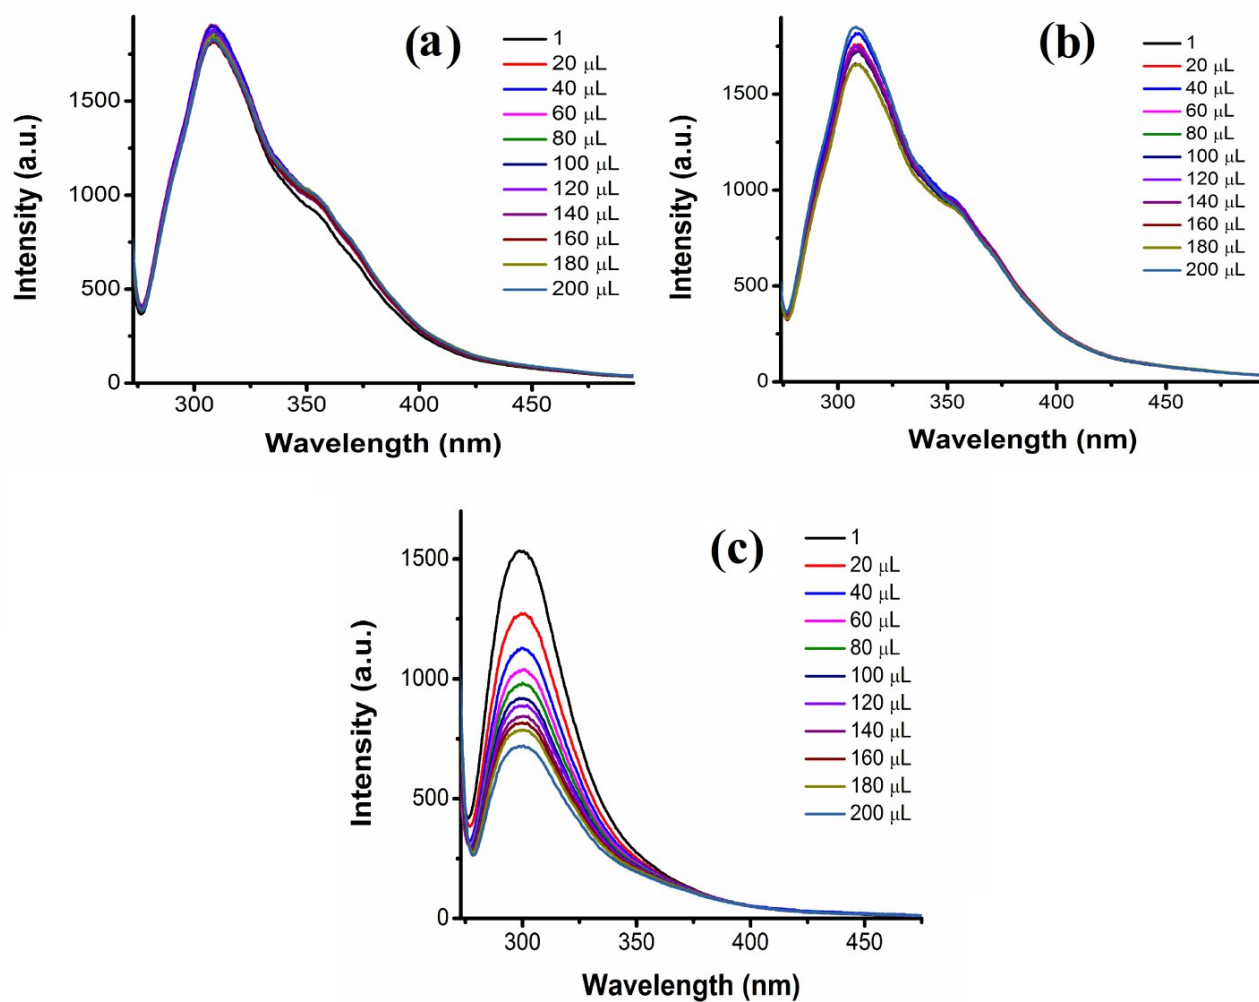

**Figure S10:** Emission spectrum of CP (**1**) upon incremental addition of 1mM solution of Zn<sup>2+</sup> (a), Hg<sup>2+</sup> (b) and Pb<sup>2+</sup> (c) metal ions in methanol.

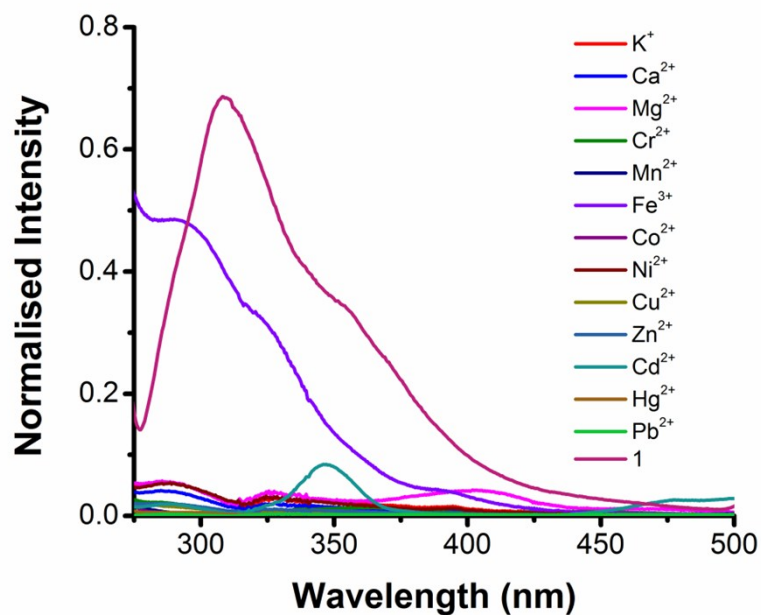

**Figure S11:** Spectral overlap between normalized emission spectra of CP (**1**) ( $\lambda_{\text{ex}} = 250 \text{ nm}$ ) and normalized absorbance spectra of the metal ions.

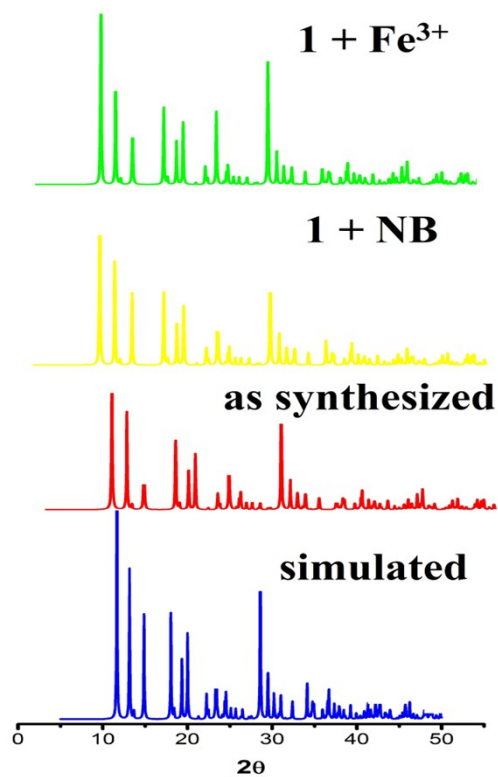

**Figure S12:** PXRD patterns of CP (**1**): simulated (blue) as-synthesized (red), after immersion in NB (yellow) and  $\text{Fe}^{3+}$  solution (green).

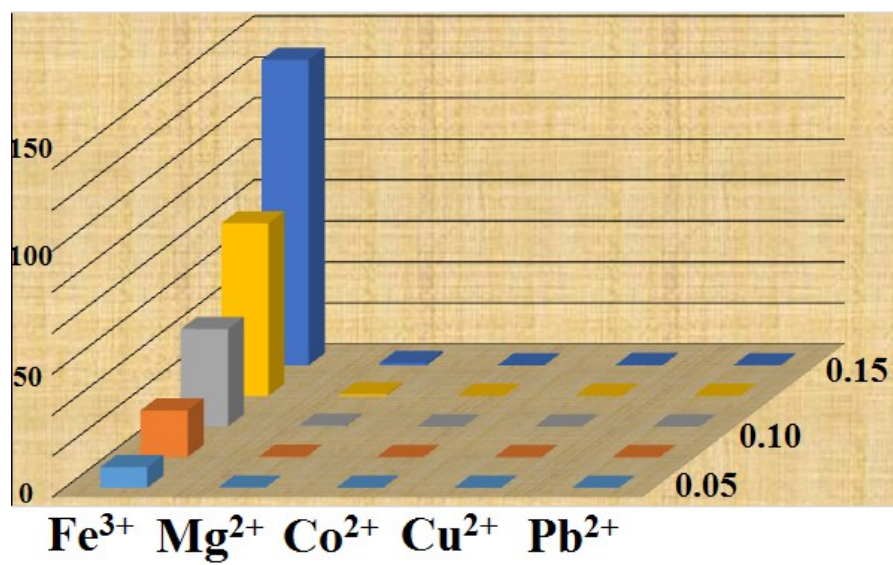

**Figure S13** 3-D representation of Stern–Volmer (SV) plot for various metal ions.

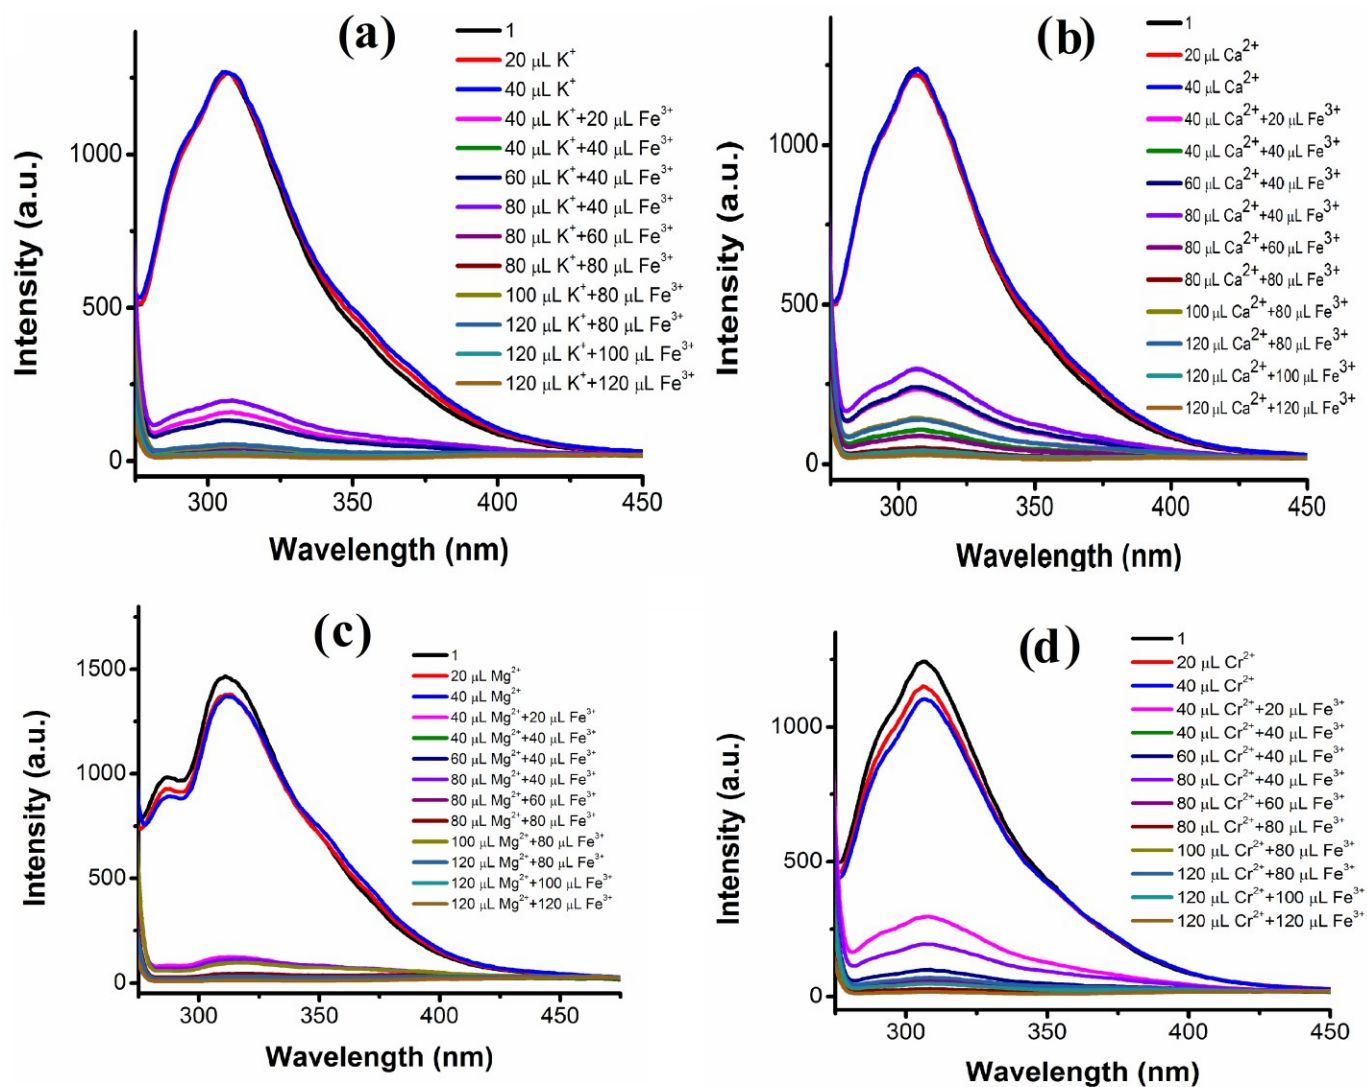

**Figure S14:** The change in fluorescence intensity of CP (**1**) upon addition of K<sup>+</sup> (a), Ca<sup>2+</sup> (b), Mg<sup>2+</sup> (c) and Cr<sup>3+</sup> (d) solution followed by Fe<sup>3+</sup> solution respectively in methanol.

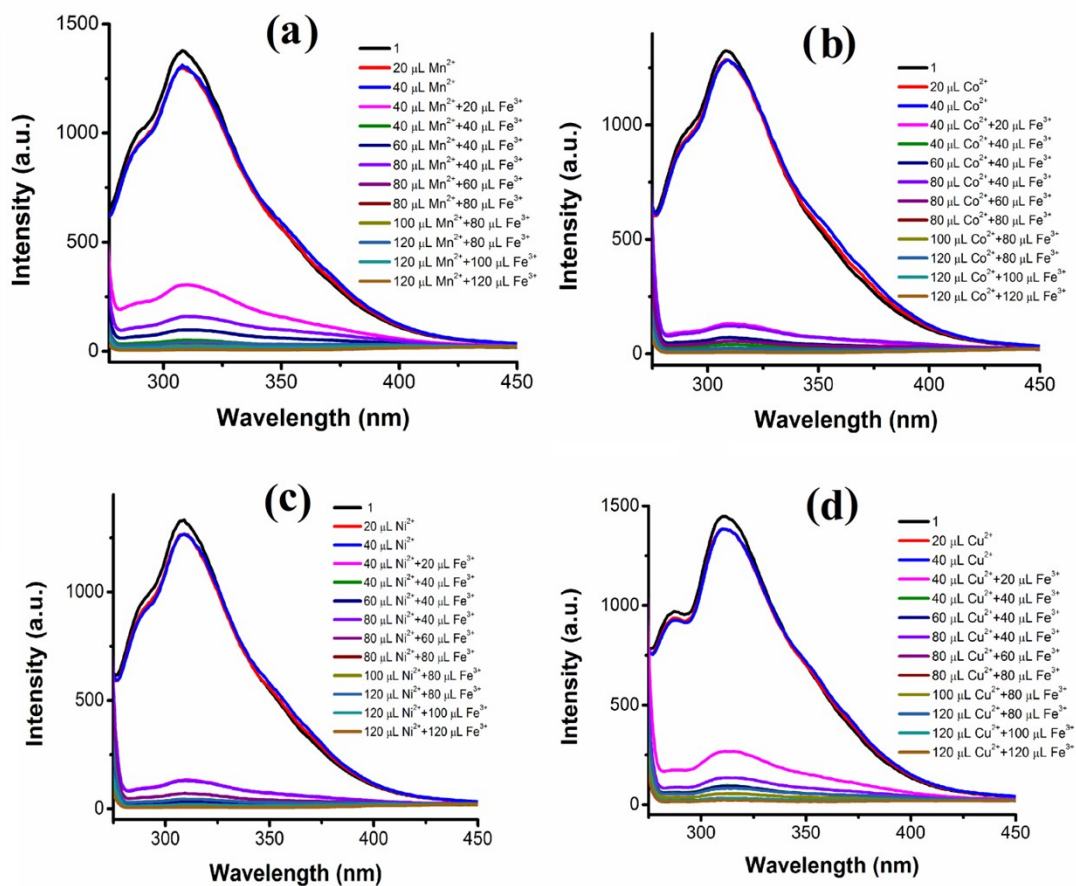

**Figure S15:** The change in fluorescence intensity of CP (**1**) upon addition of  $\text{Mn}^{2+}$  (a),  $\text{Co}^{2+}$  (b),  $\text{Ni}^{2+}$  (c) and  $\text{Cu}^{2+}$  (d) solution followed by  $\text{Fe}^{3+}$  solution respectively in methanol.

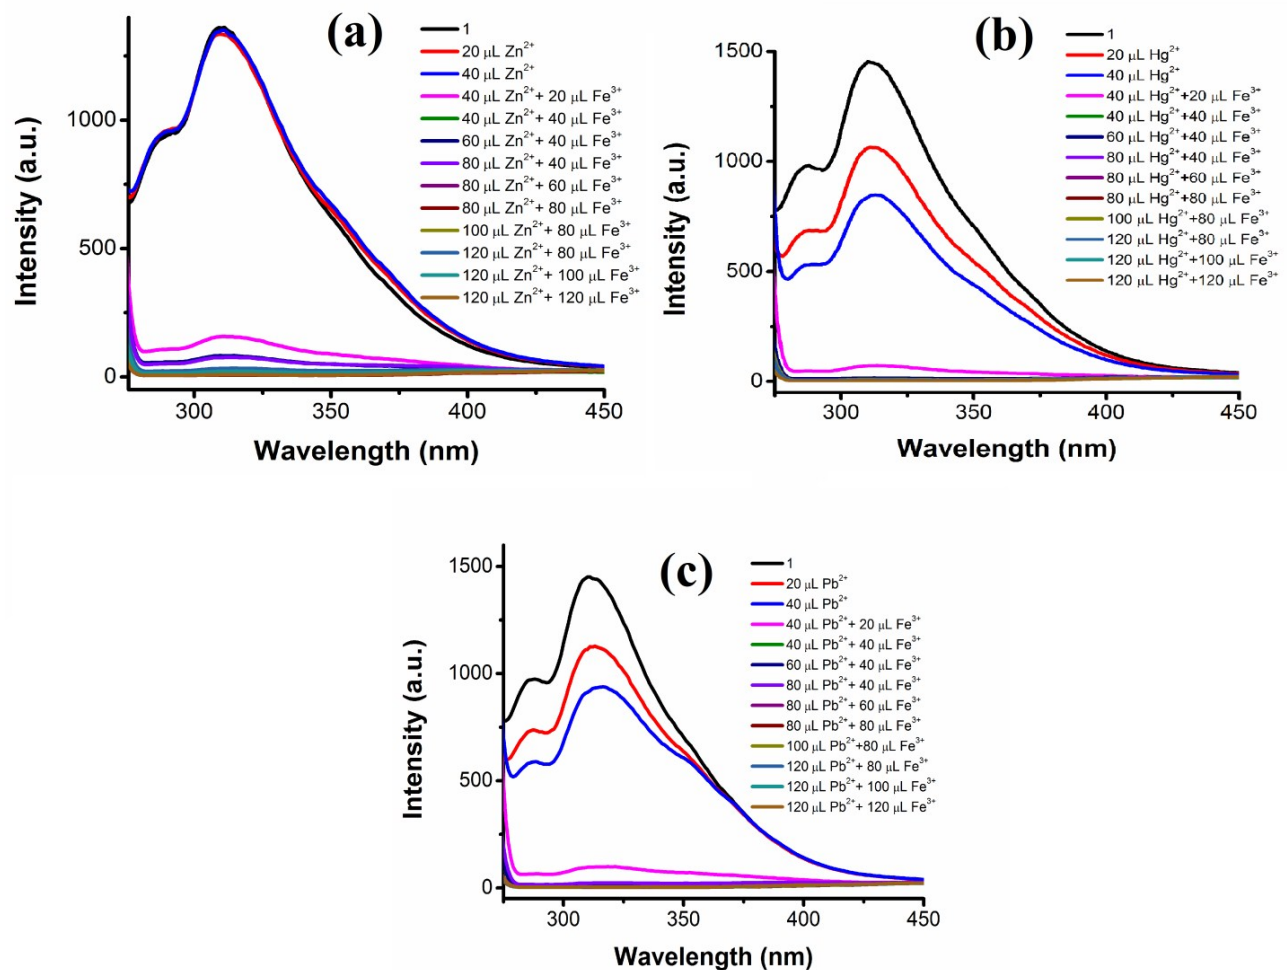

**Figure S16:** The change in fluorescence intensity of CP (**1**) upon addition of  $\text{Zn}^{2+}$  (a),  $\text{Hg}^{2+}$  (b), and  $\text{Pb}^{2+}$  (c) solution followed by  $\text{Fe}^{3+}$  solution respectively in methanol.

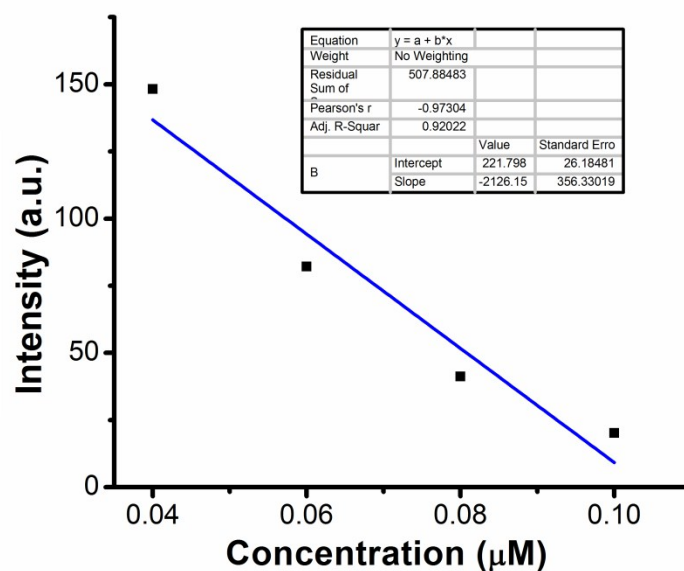

**Figure S17:** Linear region of fluorescence intensity of CP (**1**) upon addition of  $\text{Fe}^{3+}$  in methanol (20 – 200  $\mu\text{L}$ , 1 mM stock solution) (upon  $\lambda_{\text{ex}} = 250\text{nm}$ ) ( $R^2 = 0.92$ ).

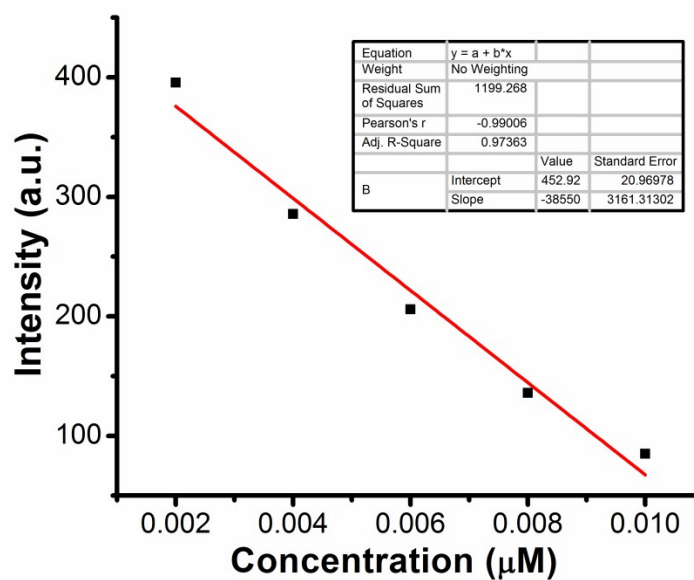

**Figure S18:** Linear region of fluorescence intensity of CP (**1**) upon addition of NB in methanol (2 – 20  $\mu\text{L}$ , 2 mM stock solution) (upon  $\lambda_{\text{ex}} = 250\text{nm}$ ) ( $R^2 = 0.97$ ).

**Calculation of standard deviation:****Table S4:** Standard deviation for CP (1).

| Blank Readings (only CP)        | Intensity of CP (1) |
|---------------------------------|---------------------|
| Reading 1                       | 907.5               |
| Reading 2                       | 910.2               |
| Reading 3                       | 911.1               |
| Reading 4                       | 904.6               |
| Reading 5                       | 914.4               |
| Standard Deviation ( $\sigma$ ) | <b>3.7</b>          |

**Calculation of Detection Limit:****Table S5:** Detection limit calculation of CP (1) for NB

| Compound 1 | Slope from Graph (m) | Detection limit ( $3\sigma/m$ ) |         |
|------------|----------------------|---------------------------------|---------|
|            |                      | $\mu\text{M}$                   | ppb     |
| <b>1</b>   | 38550                | $2.8 \times 10^{-4}$            | 0.03531 |

**Table S6:** Detection limit calculation of CP (1) for  $\text{Fe}^{3+}$ 

| Compound 1 | Slope from Graph (m) | Detection limit ( $3\sigma/m$ ) |        |
|------------|----------------------|---------------------------------|--------|
|            |                      | $\mu\text{M}$                   | ppb    |
| <b>1</b>   | 2126.15              | $5.2 \times 10^{-3}$            | 0.8434 |

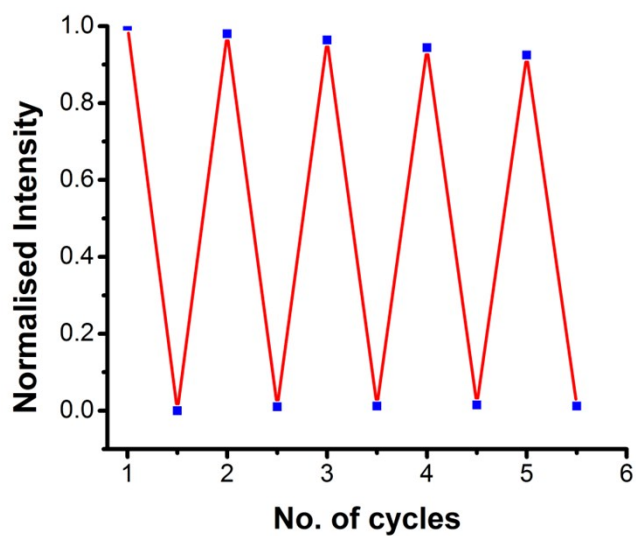

**Figure S19:** Recyclability test of CP (**1**), the upper dots represent the initial luminescence intensity and the lower dots represent the intensity upon addition of NB solution.

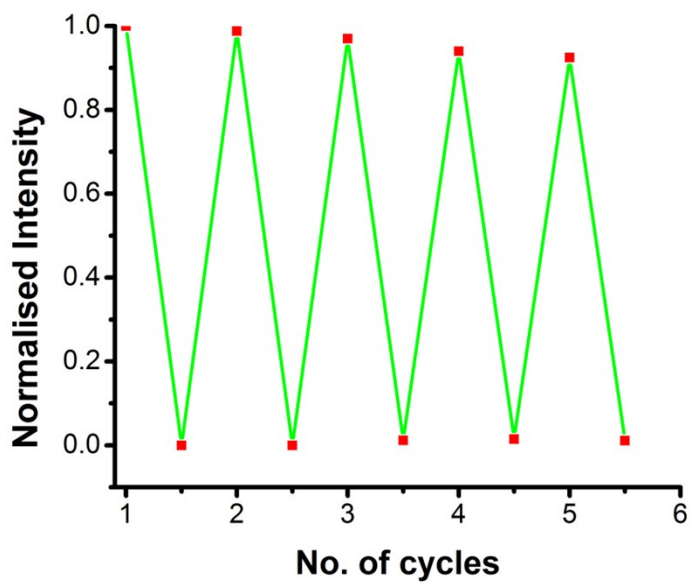

**Figure S20:** Recyclability test of CP (**1**), the upper dots represent the initial luminescence intensity and the lower dots represent the intensity upon addition of  $\text{Fe}^{3+}$  solution.

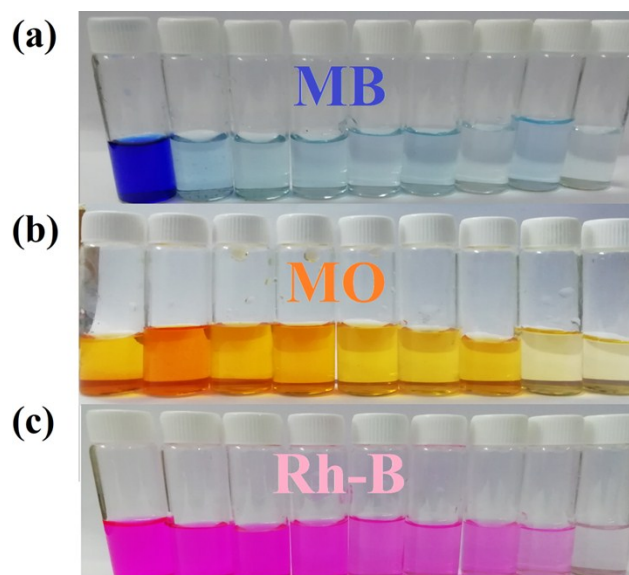

**Figure S21:** The decolorization of different dyes with increasing time MB (a), MO (b), Rh-B (c) in presence of CP (1).

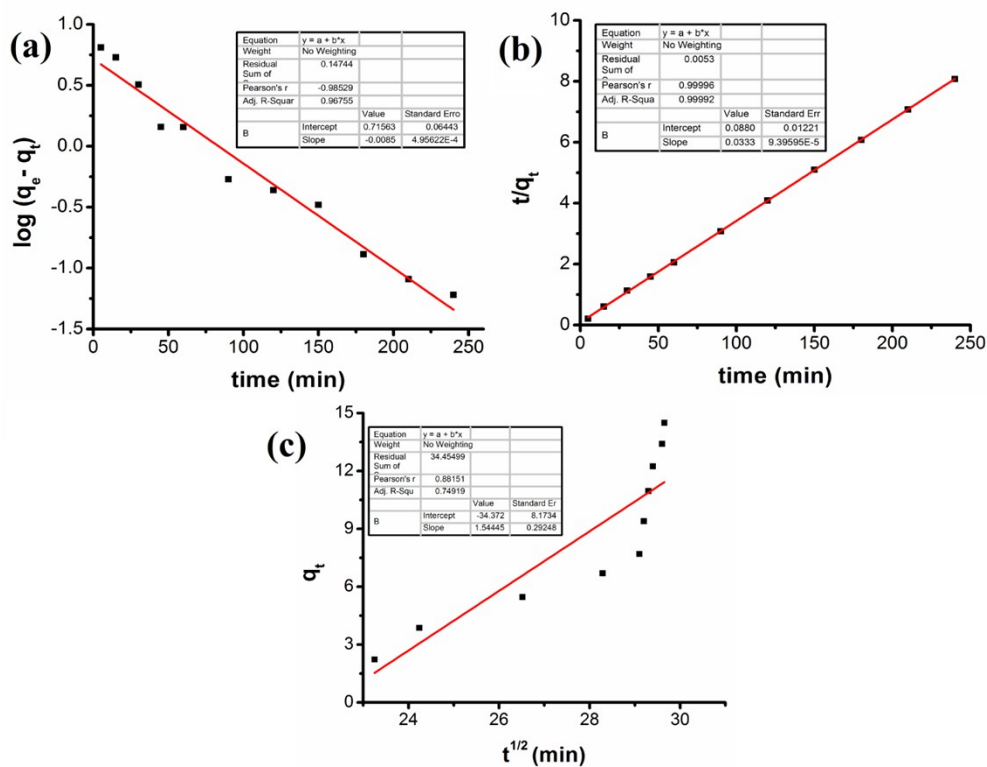

**Figure S22:** The adsorption of MB onto CP (1) using pseudo-first-order (a), pseudo-second-order (b) and intra particle (c) kinetics model.

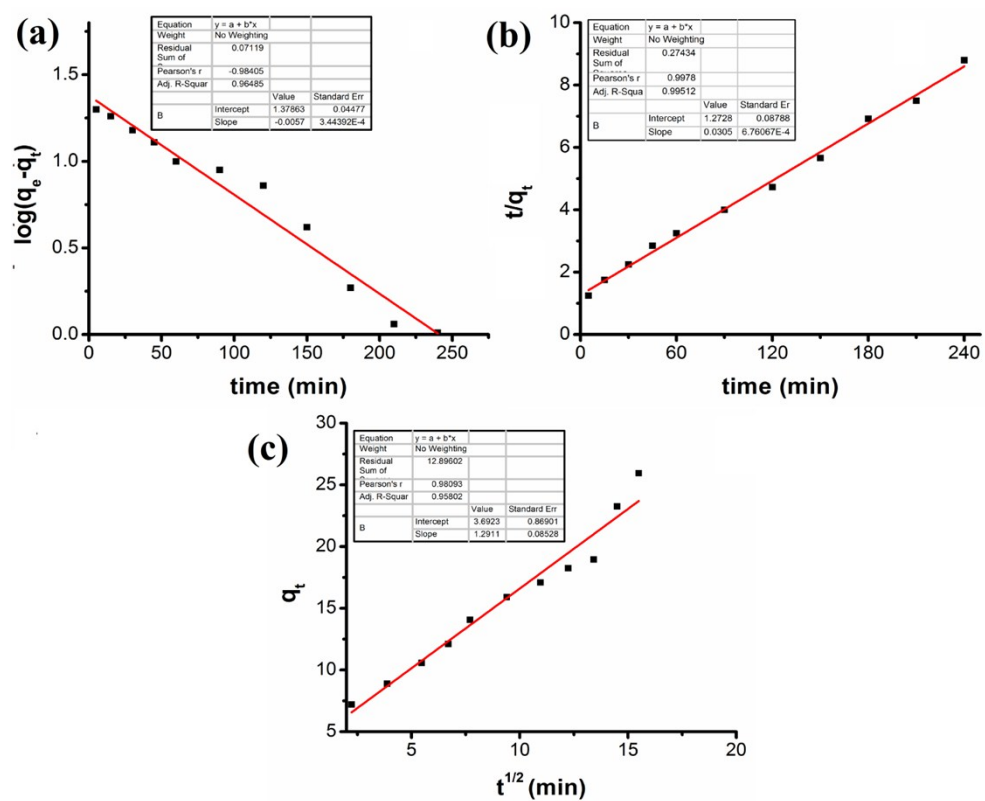

**Figure S23:** The adsorption of MO onto CP (**1**) using pseudo-first-order (a), pseudo-second-order (b), and intra particle (c) kinetics model.

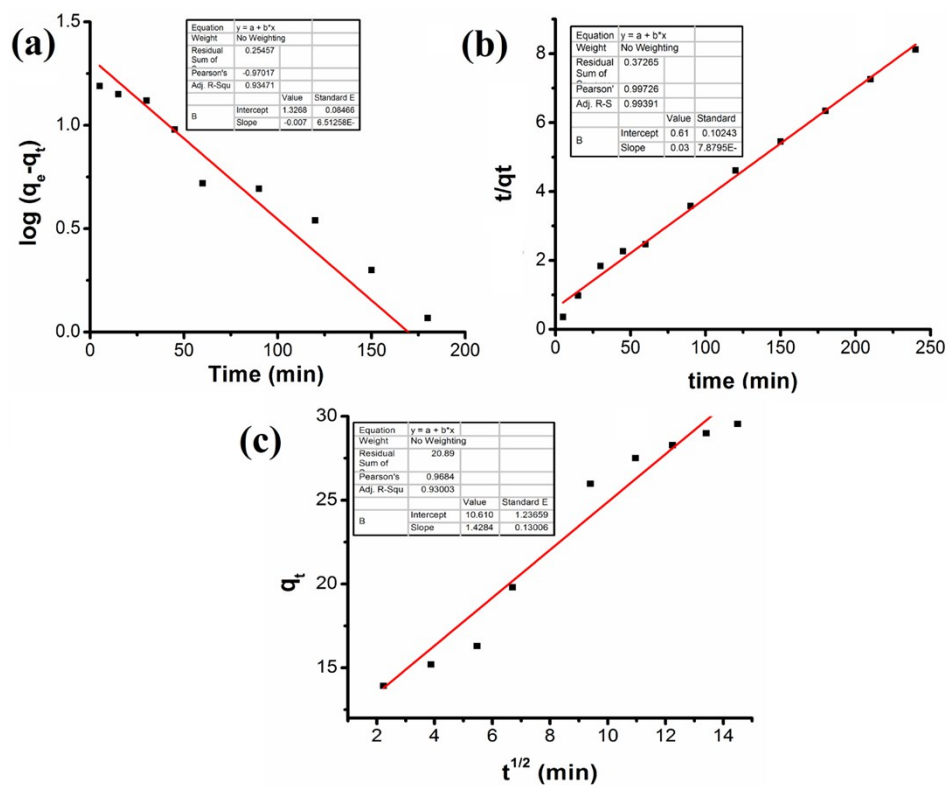

**Figure S24:** The adsorption of Rh-B onto CP (1) using pseudo-first-order (a), pseudo-second-order (b), and intra particle (c) kinetics model.
